# Supplementary material for: Efficient Production of 9,22-Dihydroxy-23,24-bisnorchol-4-ene-3-one from Phytosterols by Modifying Multiple Genes in Mycobacterium fortuitum
Source: MDPI journal article supplement (doi:10.3390/ijms25073579), 2024-03-22
Supplement: s1 [file s1]

Table S1 Primers used in this study.

| Name                                             | Nucleotide                                            |
|--------------------------------------------------|-------------------------------------------------------|
| Primers for gene deletion                        |                                                       |
| hsd4A-U-F                                        | atagaatacataggatccgtcgactggtgacgagcttcagccccgcg       |
| hsd4A-U-R                                        | tgcagtgtccccgctgaggtcgatggcttcggcacggccgagg           |
| hsd4A-D-F                                        | tcggccgtgccgaagccatcgacctcagcggggcactgcacgat          |
| hsd4A-D-R                                        | cgttgttgccattgctgcagcttaagcggcggaagcggagtggtggcg      |
| fadA5-U-F                                        | tatagaatacataggatccgtcgacctcacacgctctcggccttgatcttgac |
| fadA5-U-R                                        | ttgtcgggtgcgctccagctcgaggagctcgggtggcgtggaggcc        |
| fadA5-D-F                                        | tccacgccaccgagctcctcgagctggagcgcaccgacaagagcacg       |
| fadA5-D-R                                        | cgttgttgccattgctgcagcttaagtggccgccgcgaacagtgaacatgc   |
| Primers for gene overexpression and verification |                                                       |
| hsd4A-F                                          | atgaccactgacgacgetca                                  |
| hsd4A-R                                          | tcagtctcgtgacgcatca                                   |
| fadA5-F                                          | atgggtaaccctgtcatcgtcg                                |
| fadA5-R                                          | tcagatccgctcgatgatggt                                 |
| p40-opccR-F                                      | ccatcaggaggaatcctgcatgaccgacatgcattatgtcgttac         |
| p40-opccR-R                                      | gtgcgaagtgattcctccgcttaagtaccagtcacacccggaatcg        |
| p40-F                                            | attcgccgcccgaatgag                                    |
| p40-R                                            | ttgatgcctggcagtcgatcg                                 |

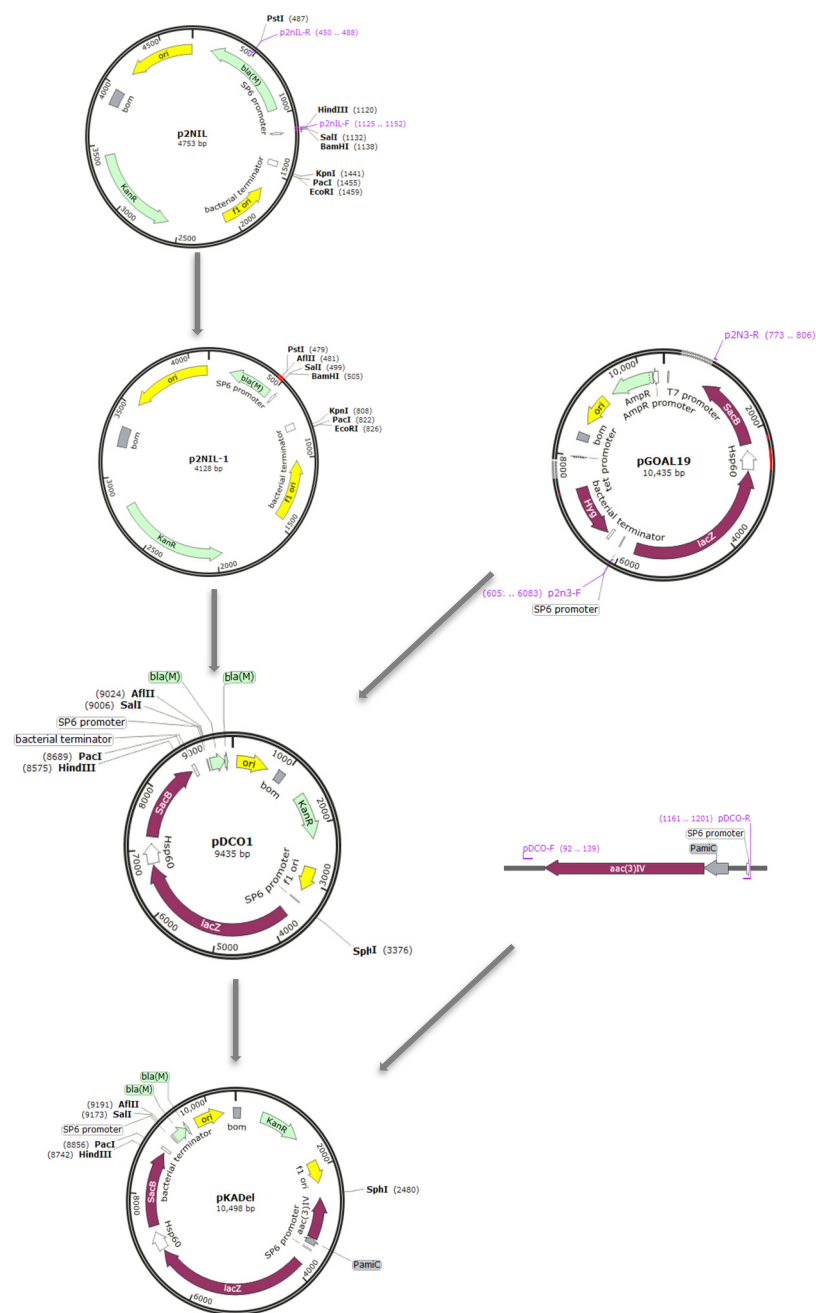

Figure S1 Construction of suicide plasmid pKADel.
